# Supplementary material for: Bimetallic nickel complexes containing imidazole-based phenolate ligands as efficient catalysts for the copolymerization of carbon dioxide with epoxides
Source: Royal Society of Chemistry journal article supplement (doi:10.1039/d3dt03084a), 2023-11-18
Supplement: d3dt03084a1.pdf [file d3dt03084a1.pdf]

# **Bimetallic nickel complexes containing imidazole-based phenolate ligands as efficient catalysts for copolymerization of carbon dioxide with epoxides**

Han-Fang Hsu, Guan-Lin Liu, Yu-Chia Su and Bao-Tsan Ko\*

*Department of Chemistry, National Chung Hsing University, Taichung 402, Taiwan*

**Scheme S1** Synthetic pathways of ligand precursors.

**Scheme S2** Selected bimetallic complexes based on amino-phenolate ligands and their catalytic performances for CO<sub>2</sub>/CHO copolymerization.

**Fig. S1** Mass spectrum of dinuclear nickel complex **1** was obtained using positive electron spray ionization (ESI<sup>+</sup>) technique.

**Fig. S2** Molecular structure of complex **2** (30% probability level). All hydrogen atoms (except those of the coordinated water) have been omitted for clarity.

**Fig. S3** Molecular structure of complex **3** (30% probability level). All hydrogen atoms (except those of the coordinated water) have been omitted for clarity.

**Fig. S4** Molecular structure of complex **4** (30% probability level). All hydrogen atoms (except those of the coordinated water) have been omitted for clarity.

**Fig. S5** Molecular structure of complex **5** (30% probability level). All hydrogen atoms (except those of the coordinated water) have been omitted for clarity.

**Fig. S6** Molecular structure of complex **6** (30% probability level). All hydrogen atoms (except those of the coordinated water) have been omitted for clarity.

**Fig. S7** Molecular structure of complex **10** (30% probability level). All hydrogen atoms have been omitted for clarity.

**Fig. S8** The plot of  $M_n$  (■) and  $D$  (▲) (determined from GPC analysis) *versus* CHO conversion for CO<sub>2</sub>-copolymerization of CHO using dinickel complex **1** as the catalyst ( $[CHO]_0/[1]_0 = 1600$ ) at 120 °C and 300 psi initial CO<sub>2</sub> pressure.

**Fig. S9** (a) GPC traces for the generated PCHC having a bimodal molecular weight distribution mediated by dinickel complex **1** (Table 3, entry 5). (b) GPC traces for the produced PCHC polyol having a unimodal molecular weight distribution mediated by Ni complex **1** (Table 4, entry 1).

**Fig. S10** <sup>1</sup>H NMR spectrum of the purified copolymer mediated by using dinickel complex **1** in the presence of CHD (Table 4, entry 1) in CDCl<sub>3</sub>. The peak at  $\delta$  4.65 ppm is assigned to the methine protons of repeated units in PCHC as well as the peaks at  $\delta$  4.37 and 3.56 ppm are assigned to methine protons that are adjacent to end-capped carbonate and hydroxy in PCHC, respectively.

**Fig. S11** MALDI-TOF spectrum of the generated PCHC polyol promoted by Ni complex **1** on the addition of CHD as the CTA (Table 4, entry 1).

**Fig. S12** The plot of TOFs with diverse initial CO<sub>2</sub> pressures (200, 250, 300 and 350 psi) using dinickel complex **1** (0.0625 mol%) at 120 °C for 1 h.

**Table S1** CO<sub>2</sub>/CHO Copolymerization catalyzed by using dinickel complex **1** under various initial CO<sub>2</sub> pressures for 1 h

**Table S2** Kinetic studies of CO<sub>2</sub>/CHO copolymerization mediated by dinickel complex **1** at diverse monomer-to-catalyst ratio (1200, 1600, 2000, 2400, 2800 and 5000)<sup>a</sup>

**Table S3** Kinetic parameters for CO<sub>2</sub>/CHO copolymerization mediated by dinickel complex **1** at various catalyst concentrations

**Table S4** Crystallographic data of complexes **1–10**

(a)

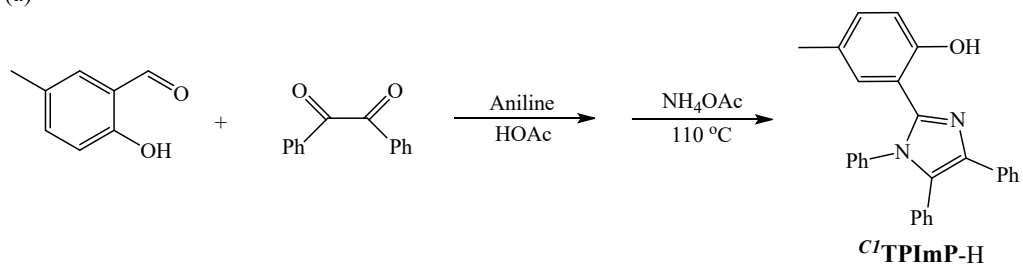

(b)

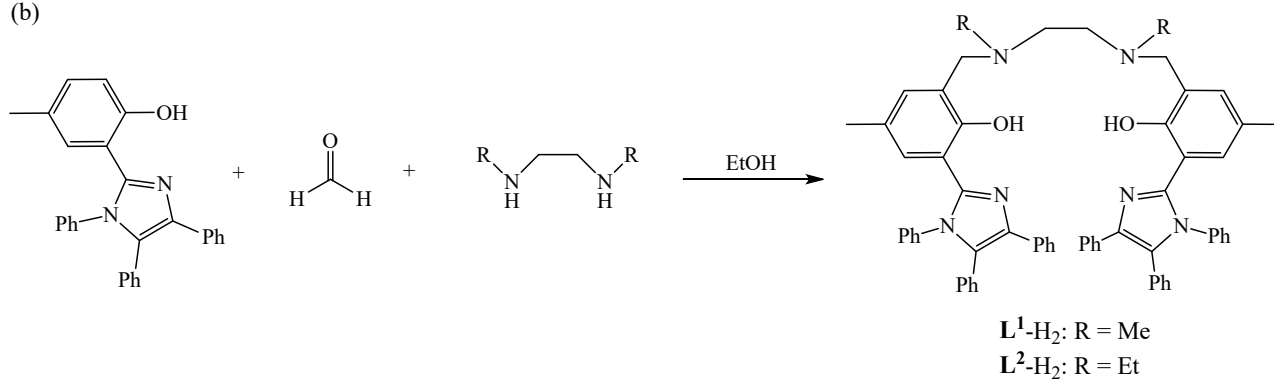

**Scheme S1** Synthetic pathways of ligand precursors.

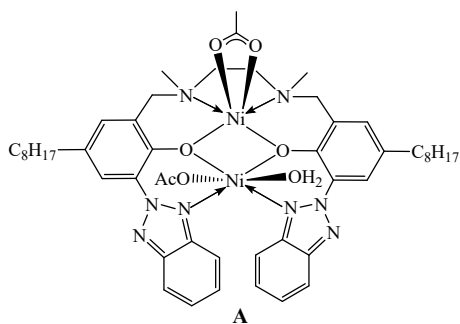

**A**  
**TOF = 204 h<sup>-1</sup>**  
 [120 °C, 300 psi, 0.0625 mol%, 4 h]<sup>34</sup>

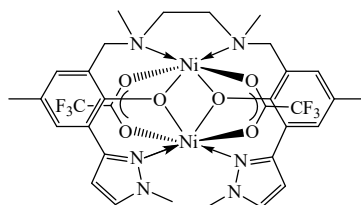

**B**  
**TOF = 144 h<sup>-1</sup>**  
 [140 °C, 300 psi, 0.0625 mol%, 6 h]<sup>35</sup>

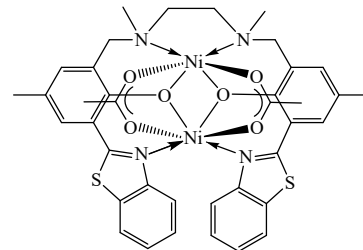

**C**  
**TOF = 212 h<sup>-1</sup>**  
 [120 °C, 300 psi, 0.0625 mol%, 4 h]<sup>36</sup>

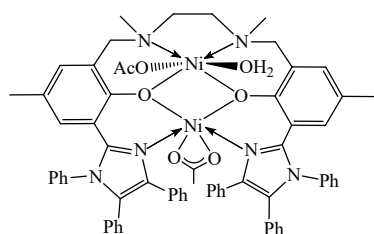

**1**  
**TOF = 496 h<sup>-1</sup>**  
 [120 °C, 300 psi, 0.0625 mol%, 2 h]  
 (This work)

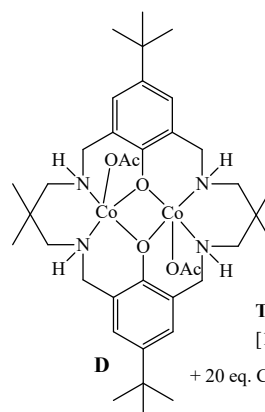

**D**  
**TOF = 4200 h<sup>-1</sup>**  
 [120 °C, 20 bar, 0.05 mol%]<sup>20</sup>  
 + 20 eq. CHD

**Scheme S2** Selected bimetallic complexes based on amino-phenolate ligands and their catalytic performances for CO<sub>2</sub>/CHO copolymerization.

HF\_OAc #1-30 RT: 0.19 AV: 1 NL: 9.43E6  
T: + c ESI Full ms [150.00-2000.00]

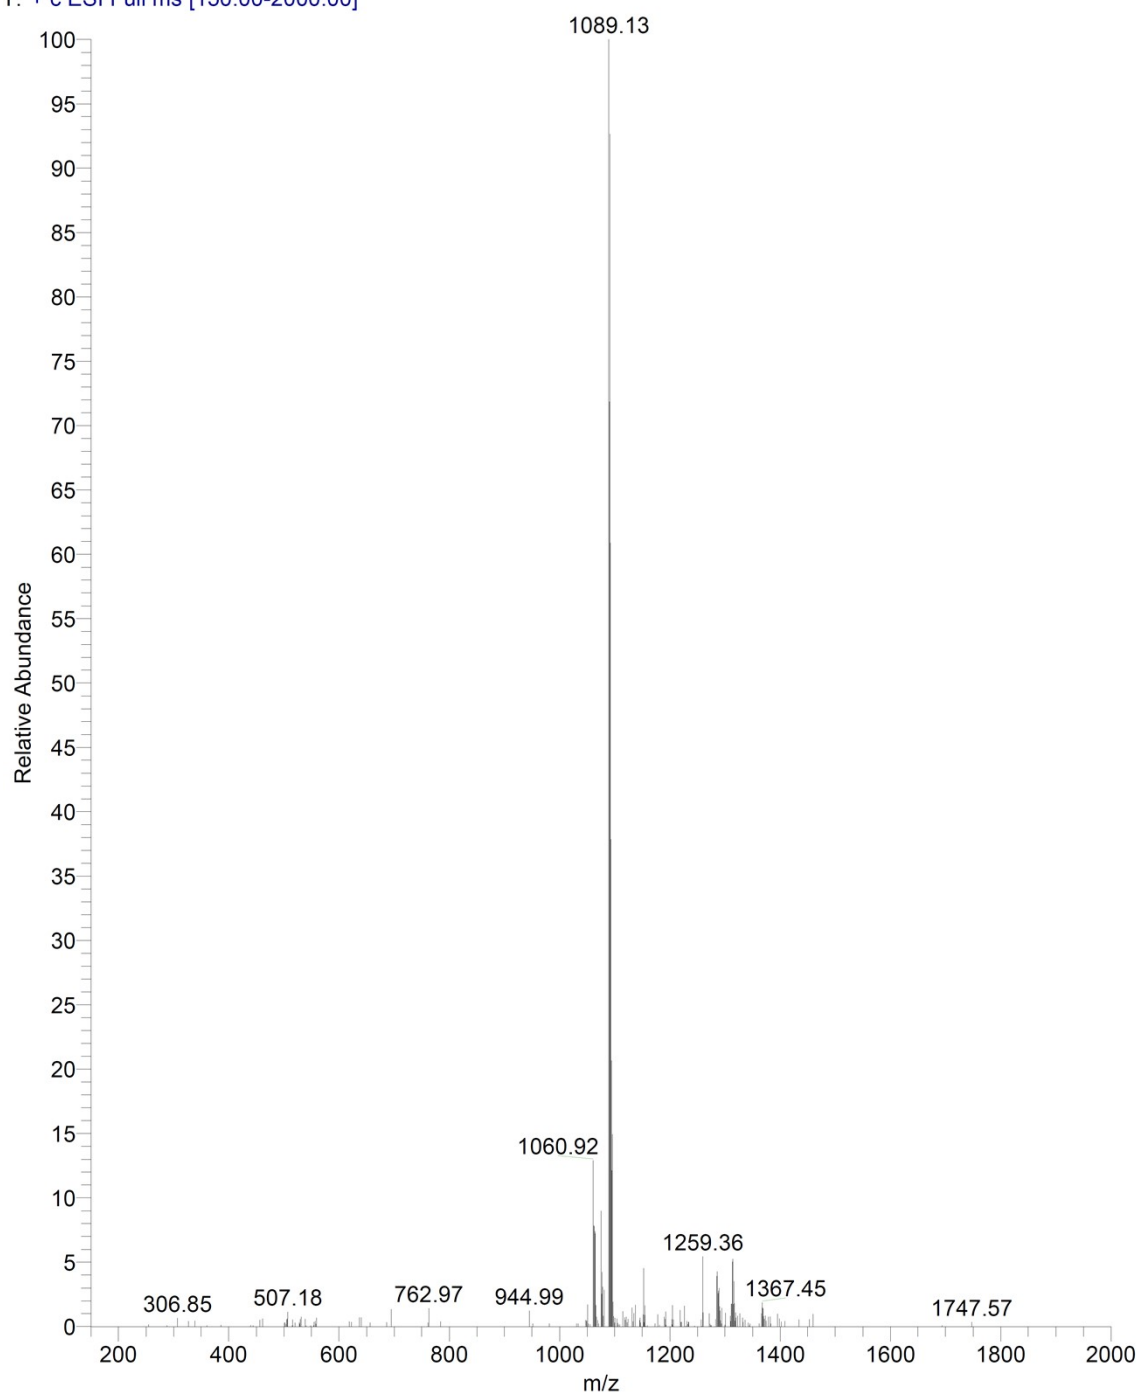

**Fig. S1** Mass spectrum of dinuclear nickel complex **1** was obtained using positive electron spray ionization (ESI<sup>+</sup>) technique.

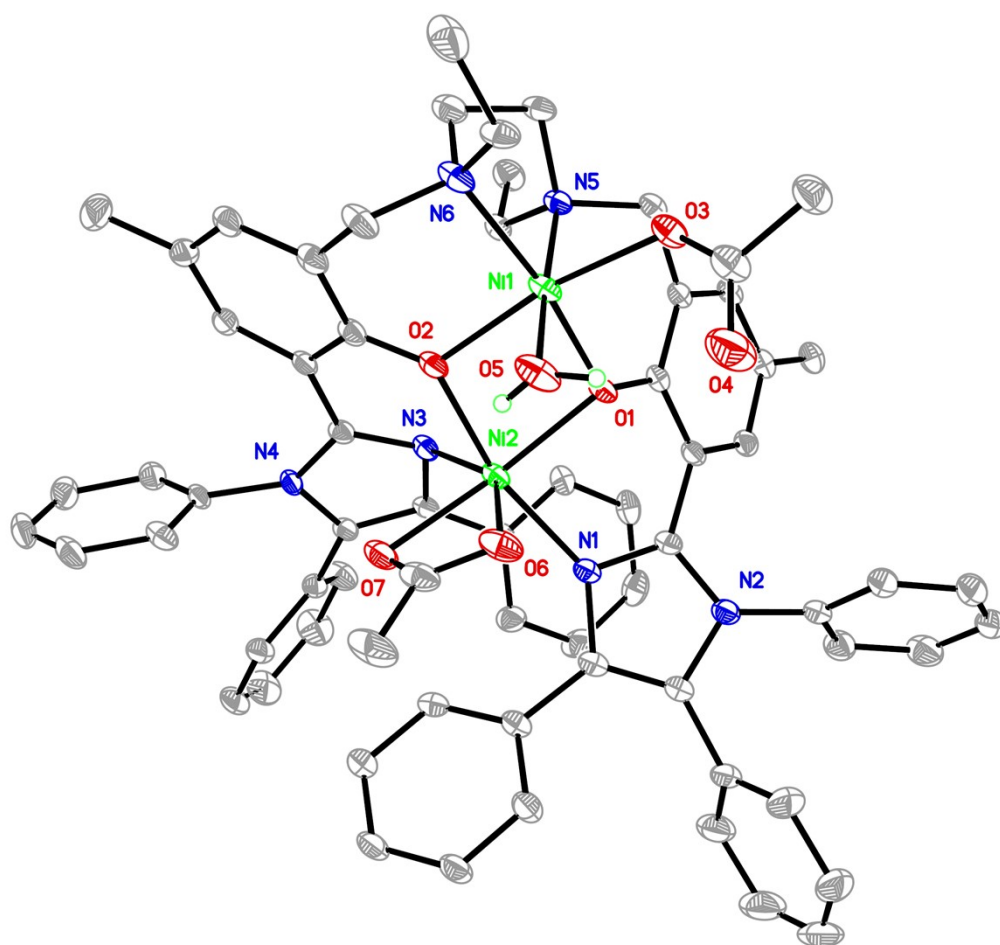

**Fig. S2** Molecular structure of complex **2** (30% probability level). All hydrogen atoms (except those of the coordinated water) have been omitted for clarity.

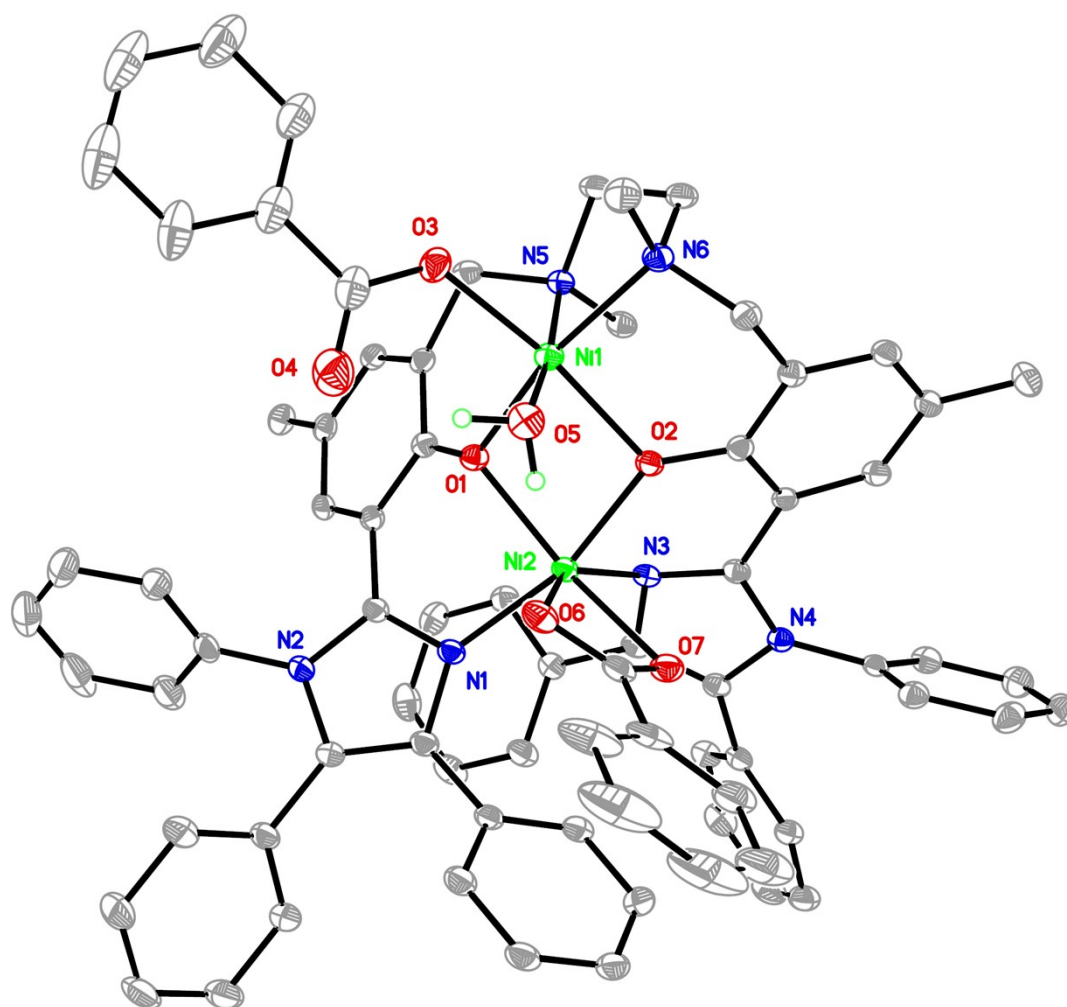

**Fig. S3** Molecular structure of complex **3** (30% probability level). All hydrogen atoms (except those of the coordinated water) have been omitted for clarity.

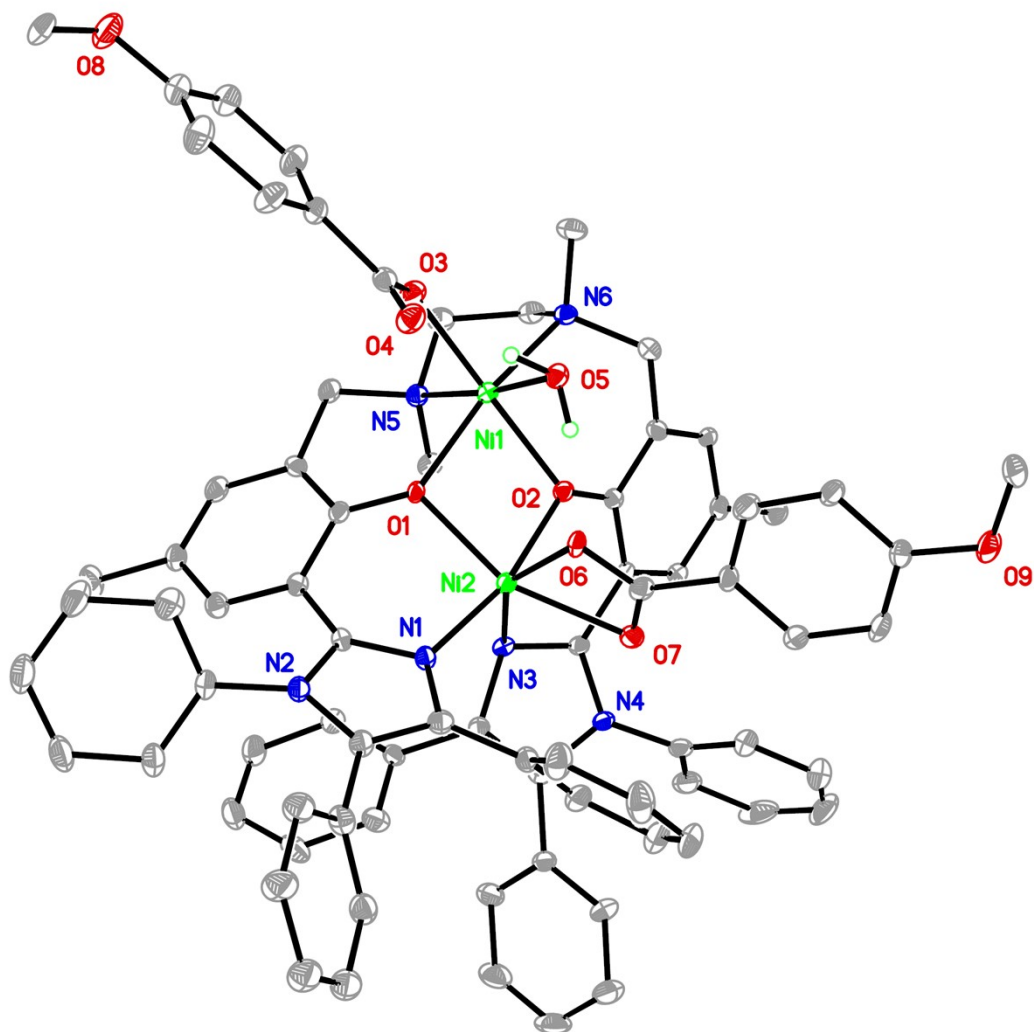

**Fig. S4** Molecular structure of complex 4 (30% probability level). All hydrogen atoms (except those of the coordinated water) have been omitted for clarity.



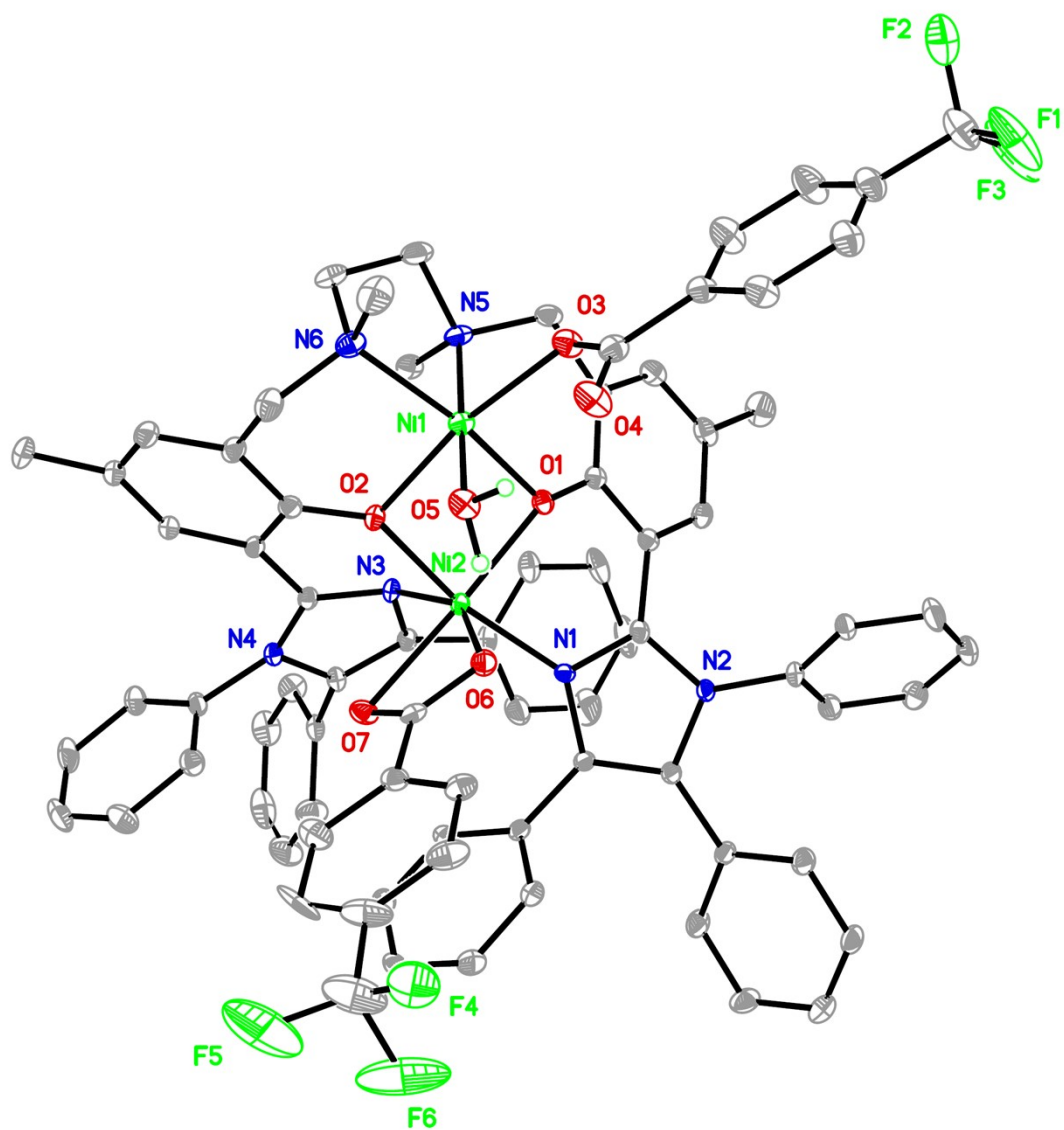

**Fig. S5** Molecular structure of complex **5** (30% probability level). All hydrogen atoms (except those of the coordinated water) have been omitted for clarity.

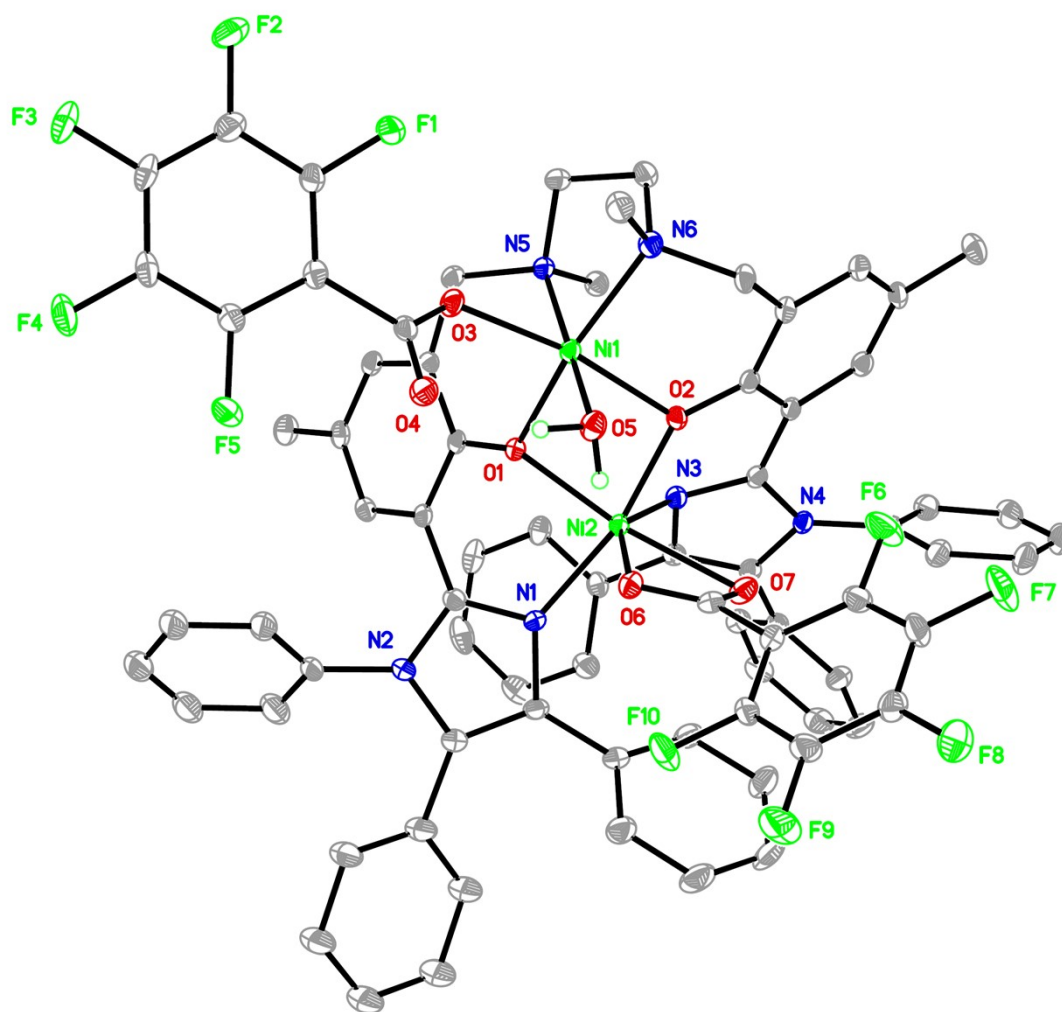

**Fig. S6** Molecular structure of complex **6** (30% probability level). All hydrogen atoms (except those of the coordinated water) have been omitted for clarity.

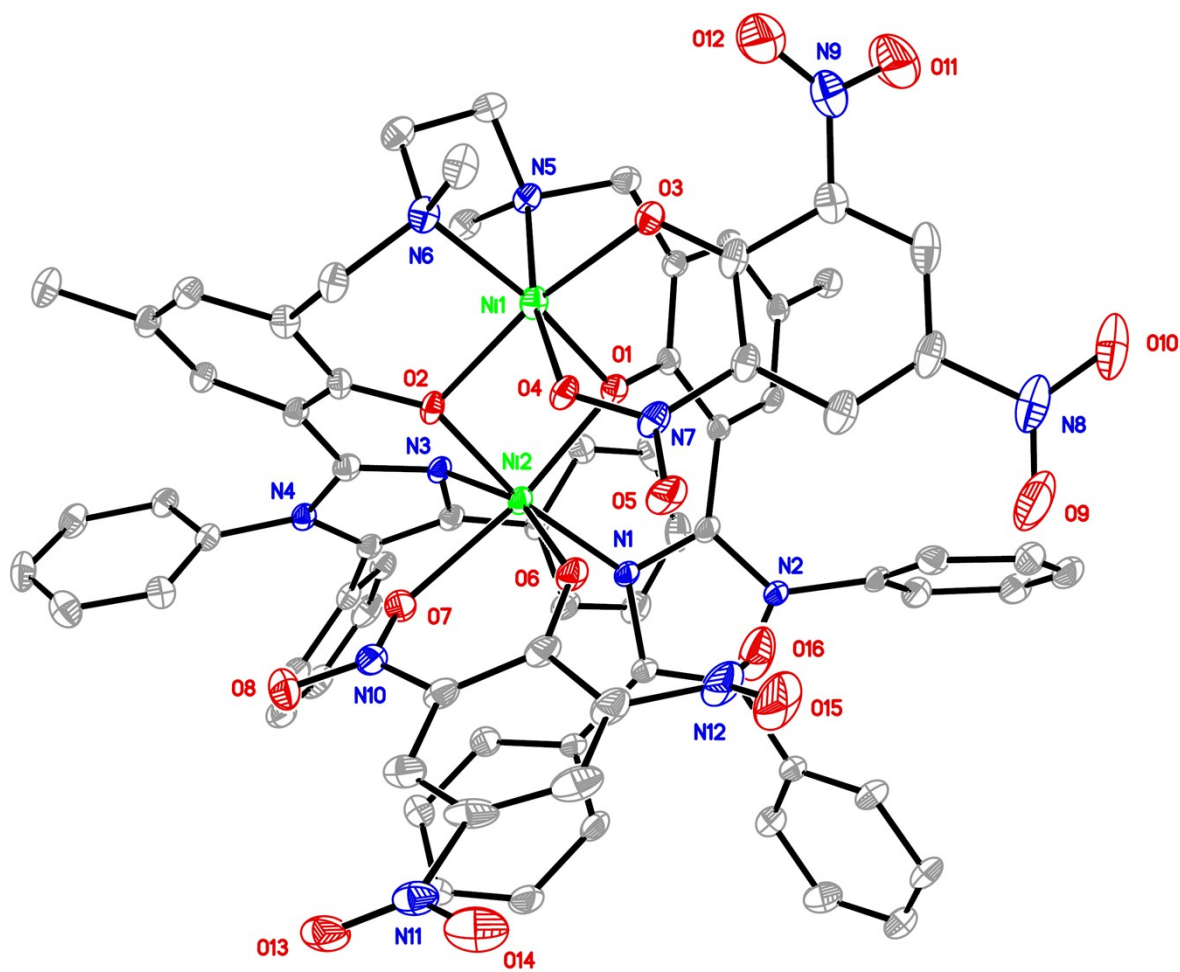

**Fig. S7** Molecular structure of complex **10** (30% probability level). All hydrogen atoms have been omitted for clarity.

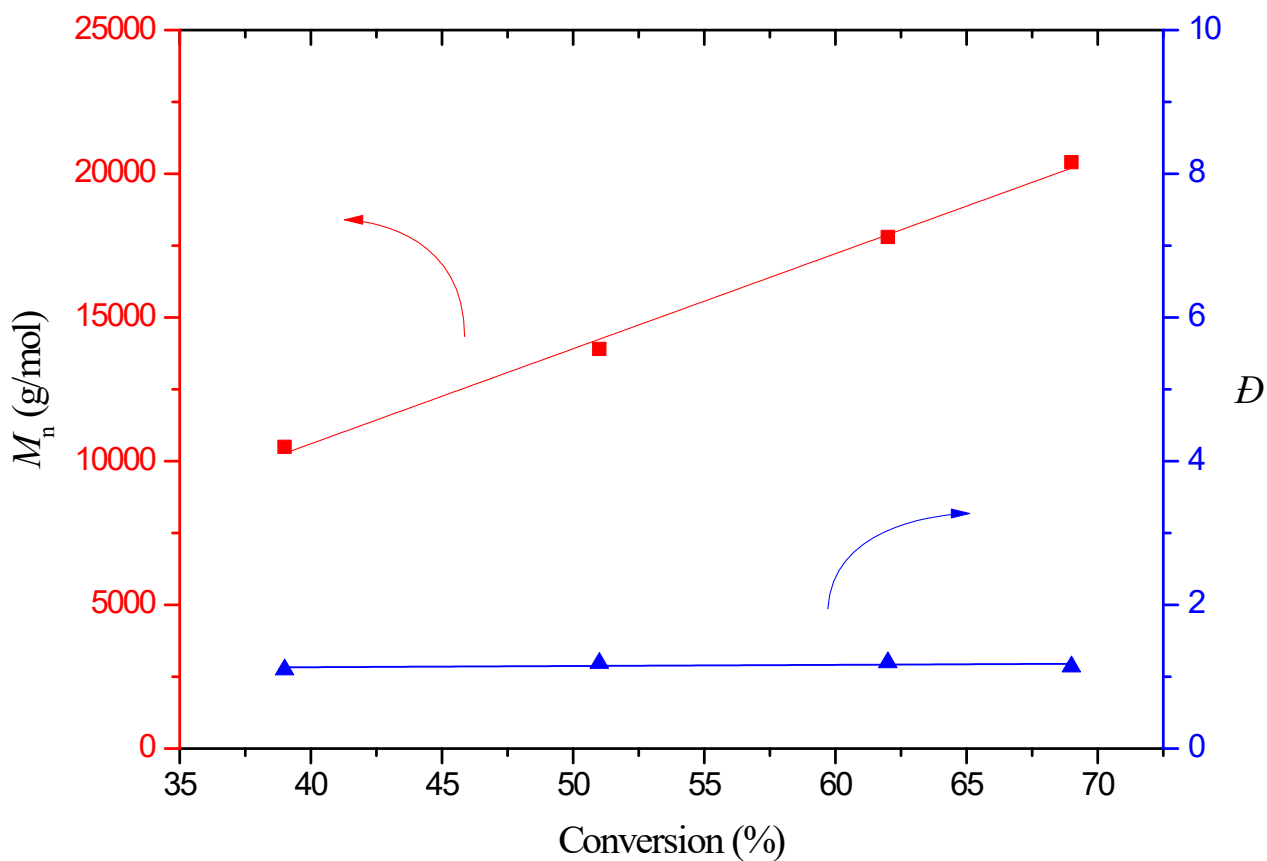

**Fig. S8** The plot of  $M_n$  (■) and  $D$  (▲) (determined from GPC analysis) versus CHO conversion for  $\text{CO}_2$ -copolymerization of CHO using dinickel complex **1** as the catalyst ( $[\text{CHO}]_0/[\mathbf{1}]_0 = 1600$ ) at 120 °C and 300 psi initial  $\text{CO}_2$  pressure.

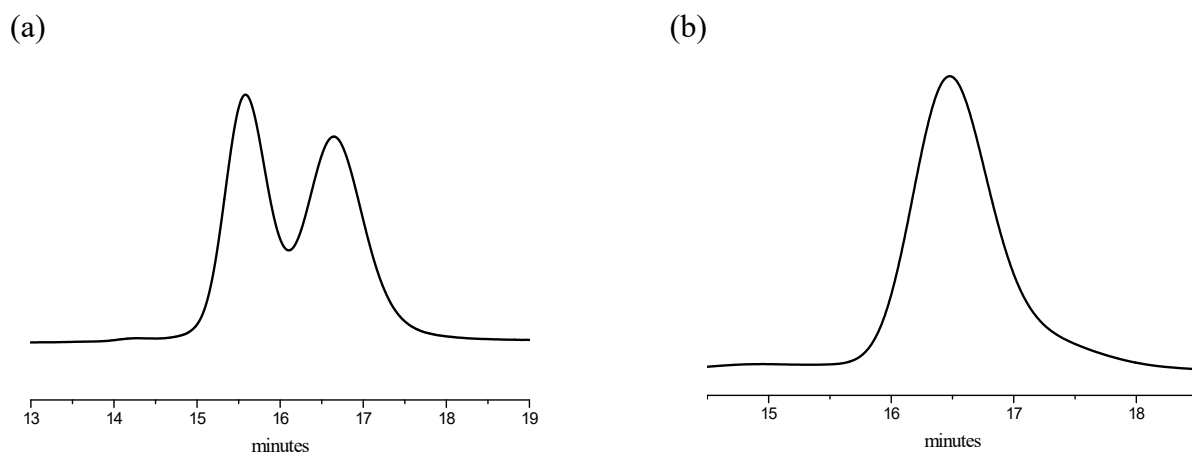

**Fig. S9** (a) GPC traces for the generated PCHC having a bimodal molecular weight distribution mediated by dinickel complex **1** (Table 3, entry 5). (b) GPC traces for the produced PCHC polyol having a unimodal molecular weight distribution mediated by Ni complex **1** (Table 4, entry 1).

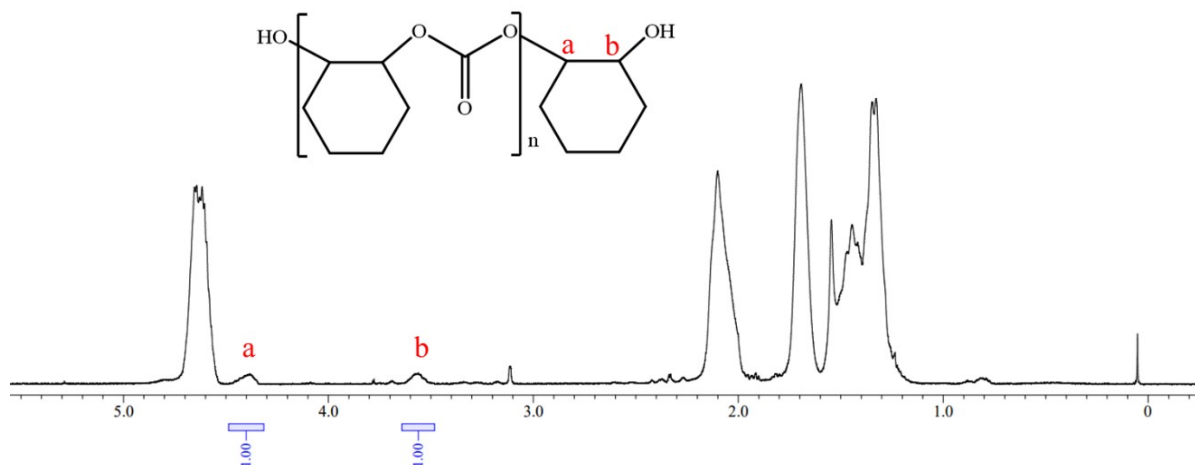

**Fig. S10** <sup>1</sup>H NMR spectrum of the purified copolymer mediated by using dinickel complex **1** in the presence of CHD (Table 4, entry 1) in CDCl<sub>3</sub>. The peak at  $\delta$  4.65 ppm is assigned to the methine protons of repeated units in PCHC as well as the peaks at  $\delta$  4.37 and 3.56 ppm are assigned to methine protons that are adjacent to end-capped carbonate and hydroxy in PCHC, respectively.

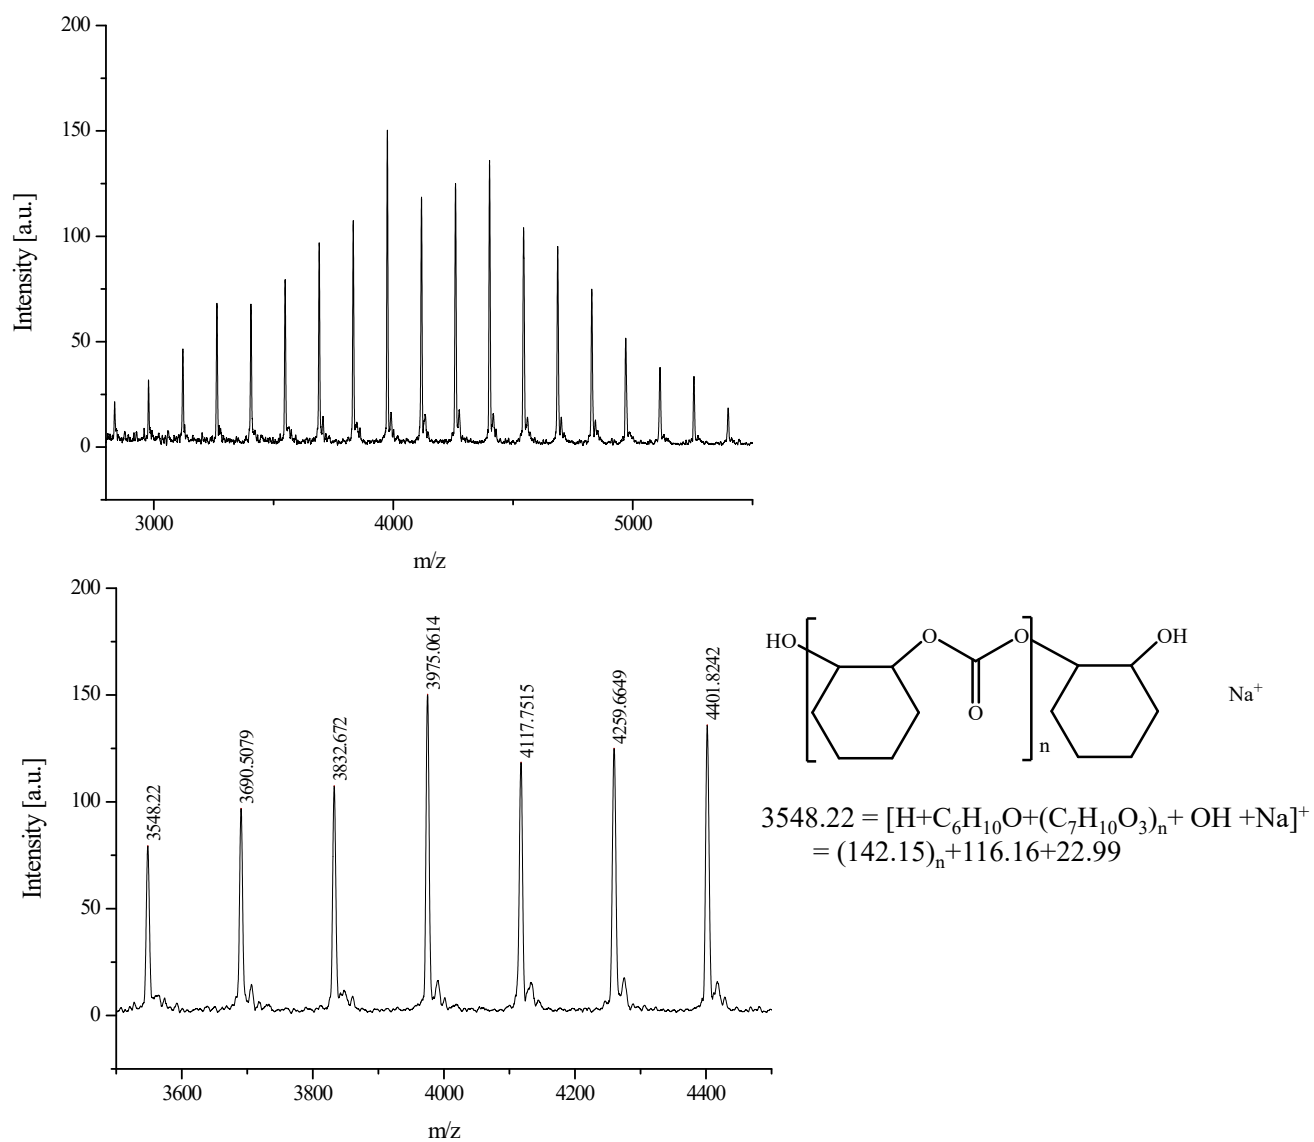

**Fig. S11** MALDI-TOF spectrum of the generated PCHC polyol promoted by Ni complex **1** on the addition of CHD as the CTA (Table 4, entry 1).

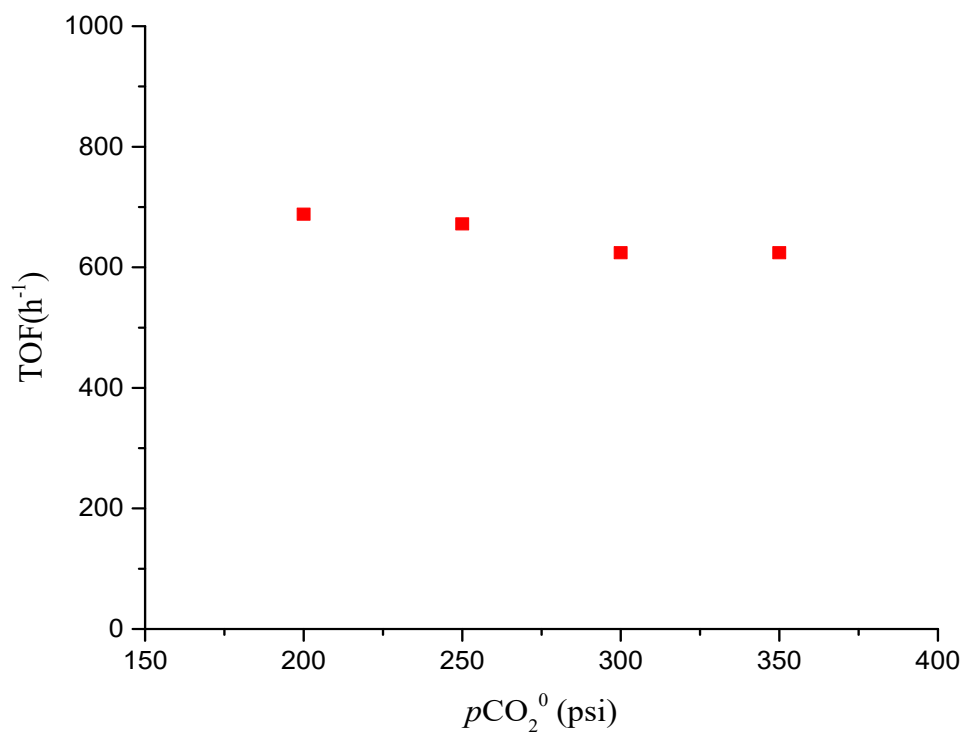

**Fig. S12** The plot of TOFs with diverse initial  $\text{CO}_2$  pressures (200, 250, 300 and 350 psi) using dinickel complex **1** (0.0625 mol%) at 120 °C for 1 h.



**Table S1** CO<sub>2</sub>/CHO Copolymerization catalyzed by using dinickel complex **1** under various initial CO<sub>2</sub> pressures for 1 h

| Entry | Pressure<br>/psi | % CHO<br>Conv. <sup>a</sup> | % Copolymer <sup>a</sup><br>(%CO <sub>3</sub> linkages) <sup>b</sup> | TON <sup>c</sup> | TOF<br>/h <sup>-1d</sup> |
|-------|------------------|-----------------------------|----------------------------------------------------------------------|------------------|--------------------------|
| S1    | 200              | 43                          | 96(>99)                                                              | 688              | 688                      |
| S2    | 250              | 42                          | 96(>99)                                                              | 672              | 672                      |
| S3    | 300              | 39                          | >99(>99)                                                             | 624              | 624                      |
| S4    | 350              | 39                          | >99(>99)                                                             | 624              | 624                      |

Copolymerization conditions: 0.0625 mol% catalyst, Temp. = 120 °C. <sup>a</sup>Based on <sup>1</sup>H NMR analysis of the reaction mixture. <sup>b</sup>Based on <sup>1</sup>H NMR determination of the purified copolymers. <sup>c</sup>TON = number of moles of CHO consumed per mole of catalyst. <sup>d</sup>TOF = TON per hour.

**Table S2** Kinetic studies of CO<sub>2</sub>/CHO copolymerization mediated by dinickel complex **1** at diverse monomer-to-catalyst ratio (1200, 1600, 2000, 2400, 2800 and 5000)<sup>a</sup>

| Entry | [CHO] <sub>0</sub> : <b>1</b> <sub>0</sub> | Time/h | %CHO Conv. <sup>b</sup> | ln([CHO] <sub>0</sub> /[CHO] <sub>t</sub> ) |
|-------|--------------------------------------------|--------|-------------------------|---------------------------------------------|
| S1    | 1200                                       | 0.5    | 34                      | 0.416                                       |
| S2    | 1200                                       | 0.75   | 42                      | 0.545                                       |
| S3    | 1200                                       | 1      | 54                      | 0.777                                       |
| S4    | 1200                                       | 1.5    | 67                      | 1.109                                       |
| S5    | 1600                                       | 1      | 39                      | 0.494                                       |
| S6    | 1600                                       | 1.5    | 51                      | 0.713                                       |
| S7    | 1600                                       | 2      | 62                      | 0.968                                       |
| S8    | 1600                                       | 2.5    | 69                      | 1.171                                       |
| S9    | 2000                                       | 1      | 35                      | 0.431                                       |
| S10   | 2000                                       | 1.5    | 44                      | 0.580                                       |
| S11   | 2000                                       | 2      | 54                      | 0.777                                       |
| S12   | 2000                                       | 2.5    | 63                      | 0.994                                       |
| S13   | 2400                                       | 1      | 25                      | 0.288                                       |
| S14   | 2400                                       | 1.5    | 36                      | 0.446                                       |
| S15   | 2400                                       | 2      | 45                      | 0.598                                       |
| S16   | 2400                                       | 2.5    | 52                      | 0.734                                       |
| S17   | 2800                                       | 1      | 22                      | 0.248                                       |
| S18   | 2800                                       | 1.5    | 31                      | 0.371                                       |
| S19   | 2800                                       | 2      | 39                      | 0.494                                       |
| S20   | 2800                                       | 2.5    | 45                      | 0.598                                       |
| S21   | 5000                                       | 2      | 22                      | 0.248                                       |

|     |      |   |    |       |
|-----|------|---|----|-------|
| S22 | 5000 | 3 | 32 | 0.386 |
| S23 | 5000 | 4 | 39 | 0.494 |
| S24 | 5000 | 5 | 45 | 0.598 |

---

<sup>a</sup>Copolymerization conditions: 100.0 mmol CHO, 120 °C,  $p\text{CO}_2^0 = 300$  psi. <sup>b</sup>Based on <sup>1</sup>H NMR analysis of the reaction mixture.

**Table S3** Kinetic parameters for CO<sub>2</sub>/CHO copolymerization mediated by dinickel complex **1** at various catalyst concentrations

| Entry | [CHO] <sub>0</sub> : <b>1</b> <sub>0</sub> | Observed rate coefficient,                              | ln( <i>k</i> <sub>obs</sub> ) | catalyst concentrations   | ln <b>1</b> |
|-------|--------------------------------------------|---------------------------------------------------------|-------------------------------|---------------------------|-------------|
|       |                                            | <i>k</i> <sub>obs</sub> (h <sup>-1</sup> ) <sup>a</sup> |                               | <b>1</b> (M) <sup>b</sup> |             |
| S1    | 1200                                       | 0.7099                                                  | -0.343                        | 8.333 x 10 <sup>-3</sup>  | -4.788      |
| S2    | 1600                                       | 0.4570                                                  | -0.783                        | 6.250 x 10 <sup>-3</sup>  | -5.075      |
| S3    | 2000                                       | 0.3774                                                  | -0.974                        | 5.000 x 10 <sup>-3</sup>  | -5.298      |
| S4    | 2400                                       | 0.2981                                                  | -1.210                        | 4.167 x 10 <sup>-3</sup>  | -5.481      |
| S5    | 2800                                       | 0.2343                                                  | -1.451                        | 3.571 x 10 <sup>-3</sup>  | -5.635      |
| S6    | 5000                                       | 0.1157                                                  | -2.157                        | 2.000 x 10 <sup>-3</sup>  | -6.215      |

<sup>a</sup>Calculated from the slope of the fitted regression line of Fig. 6a.

<sup>b</sup>A fixed amount of CHO (100.0 mmol) was used.

**Table S4** Crystallographic data of complexes **1–10**

|                                                    | <b>1</b> ·0.5[C <sub>3</sub> H <sub>6</sub> O] | <b>2</b> ·1[H <sub>2</sub> O]·1.5[CH <sub>2</sub> Cl <sub>2</sub> ] | <b>3</b> ·1[C <sub>6</sub> H <sub>14</sub> ]·1.5[CH <sub>2</sub> Cl <sub>2</sub> ] | <b>4</b> ·1[H <sub>2</sub> O]<br>2[C <sub>6</sub> H <sub>14</sub> ] |
|----------------------------------------------------|------------------------------------------------|---------------------------------------------------------------------|------------------------------------------------------------------------------------|---------------------------------------------------------------------|
| Temp (K)                                           | 150.15                                         | 181                                                                 | 150                                                                                | 150.15                                                              |
| Crystal system                                     | Monoclinic                                     | Trigonal                                                            | Triclinic                                                                          | Monoclinic                                                          |
| Space group                                        | <i>P2</i> <sub>1</sub> / <i>n</i>              | <i>R</i> -3                                                         | <i>P</i> -1                                                                        | <i>P2</i> <sub>1</sub> / <i>n</i>                                   |
| <i>a</i> (Å)                                       | 12.5633(11)                                    | 38.1705(19)                                                         | 14.4235(18)                                                                        | 15.0623(12)                                                         |
| <i>b</i> (Å)                                       | 32.882(3)                                      | 38.1705(19)                                                         | 16.341(2)                                                                          | 47.324(4)                                                           |
| <i>c</i> (Å)                                       | 14.9737(12)                                    | 22.8167(10)                                                         | 17.149(2)                                                                          | 11.6909(8)                                                          |
| $\alpha$ (deg)                                     | 90                                             | 90                                                                  | 78.062(4)                                                                          | 90                                                                  |
| $\beta$ (deg)                                      | 107.869(3)                                     | 90                                                                  | 78.226(4)                                                                          | 112.230(2)                                                          |
| $\gamma$ (deg)                                     | 90                                             | 120                                                                 | 73.085(5)                                                                          | 90                                                                  |
| <i>V</i> (Å <sup>3</sup> )                         | 5887.3(9)                                      | 28790(3)                                                            | 3738.6(9)                                                                          | 7714.0(10)                                                          |
| <i>Z</i>                                           | 4                                              | 18                                                                  | 2                                                                                  | 4                                                                   |
| <i>D</i> <sub>calc</sub> (Mg/m <sup>3</sup> )      | 1.351                                          | 1.393                                                               | 1.338                                                                              | 1.329                                                               |
| $\mu$ (Mo K $\alpha$ )(mm <sup>-1</sup> )          | 0.701                                          | 0.775                                                               | 0.670                                                                              | 0.554                                                               |
| <i>F</i> (000)                                     | 2512                                           | 12618                                                               | 1578                                                                               | 3272                                                                |
| Reflections collected                              | 80197                                          | 135930                                                              | 50721                                                                              | 73662                                                               |
| No. of parameters                                  | 762                                            | 777                                                                 | 872                                                                                | 927                                                                 |
| Indep. reflns ( <i>R</i> <sub>int</sub> )          | 10338 (0.0973)                                 | 11253 (0.0851)                                                      | 13111 (0.0345)                                                                     | 13515 (0.0746)                                                      |
| <i>R</i> 1[ <i>I</i> > 2 $\sigma$ ( <i>I</i> )]    | 0.0967                                         | 0.0498,                                                             | 0.0392                                                                             | 0.0778                                                              |
| w <i>R</i> 2 [ <i>I</i> > 2 $\sigma$ ( <i>I</i> )] | 0.2161                                         | 0.1189                                                              | 0.1004                                                                             | 0.1687                                                              |
| Goodness-of-fit on <i>F</i> <sup>2</sup>           | 1.298                                          | 1.073                                                               | 1.048                                                                              | 1.107                                                               |

**Table S4** Crystallographic data of complexes **1–10** (Cont'd)

|                                                    | <b>5</b> ·2[C <sub>4</sub> H <sub>10</sub> O] | <b>6</b> ·2[C <sub>6</sub> H <sub>14</sub> ] | <b>7</b> ·2[H <sub>2</sub> O]·3[CH <sub>2</sub> Cl <sub>2</sub> ] | <b>8</b> ·1[CH <sub>2</sub> Cl <sub>2</sub> ]·2[CH <sub>3</sub> OH] |
|----------------------------------------------------|-----------------------------------------------|----------------------------------------------|-------------------------------------------------------------------|---------------------------------------------------------------------|
| Temp (K)                                           | 150                                           | 150                                          | 150.15                                                            | 150                                                                 |
| Crystal system                                     | Monoclinic                                    | Triclinic                                    | Triclinic                                                         | Triclinic                                                           |
| Space group                                        | <i>P</i> 2 <sub>1</sub> / <i>n</i>            | <i>P</i> -1                                  | <i>P</i> -1                                                       | <i>P</i> -1                                                         |
| <i>a</i> (Å)                                       | 12.1166(8)                                    | 14.930(3)                                    | 12.6449(17)                                                       | 11.4310(14)                                                         |
| <i>b</i> (Å)                                       | 15.1812(11)                                   | 15.514(3)                                    | 13.4163(19)                                                       | 13.7228(16)                                                         |
| <i>c</i> (Å)                                       | 40.797(3)                                     | 17.571(4)                                    | 22.200(3)                                                         | 21.986(3)                                                           |
| $\alpha$ (deg)                                     | 90                                            | 98.726(7)                                    | 87.747(4)                                                         | 85.922(4)                                                           |
| $\beta$ (deg)                                      | 95.998(2)                                     | 97.283(7)                                    | 74.480(4)                                                         | 74.860(5)                                                           |
| $\gamma$ (deg)                                     | 90                                            | 107.756(7)                                   | 72.929(4)                                                         | 84.965(4)                                                           |
| <i>V</i> (Å <sup>3</sup> )                         | 7463.3(9)                                     | 3766.0(12)                                   | 3465.8(8)                                                         | 3312.1(7)                                                           |
| <i>Z</i>                                           | 4                                             | 2                                            | 2                                                                 | 2                                                                   |
| <i>D</i> <sub>calc</sub> (Mg/m <sup>3</sup> )      | 1.403                                         | 1.451                                        | 1.485                                                             | 1.423                                                               |
| $\mu$ (Mo K $\alpha$ )(mm <sup>-1</sup> )          | 0.584                                         | 0.588                                        | 0.850                                                             | 0.756                                                               |
| <i>F</i> (000)                                     | 3296                                          | 1712                                         | 1592                                                              | 1476                                                                |
| Reflections collected                              | 98493                                         | 52911                                        | 40229                                                             | 43590                                                               |
| No. of parameters                                  | 911                                           | 915                                          | 797                                                               | 808                                                                 |
| Indep. reflns ( <i>R</i> <sub>int</sub> )          | 13088 (0.0822)                                | 13208 (0.0535)                               | 12114 (0.1011)                                                    | 11577 (0.0477)                                                      |
| <i>R</i> 1[ <i>I</i> > 2 $\sigma$ ( <i>I</i> )]    | 0.0679                                        | 0.0379                                       | 0.0955                                                            | 0.0637                                                              |
| w <i>R</i> 2 [ <i>I</i> > 2 $\sigma$ ( <i>I</i> )] | 0.1578                                        | 0.0977                                       | 0.2416                                                            | 0.1544                                                              |
| Goodness-of-fit on <i>F</i> <sup>2</sup>           | 1.179                                         | 1.037                                        | 1.056                                                             | 1.059                                                               |

**Table S4** Crystallographic data of complexes **1–10** (Cont'd)

|                                                    | <b>9·1</b> [H <sub>2</sub> O] | <b>10·2</b> [CH <sub>2</sub> Cl <sub>2</sub> ] |
|----------------------------------------------------|-------------------------------|------------------------------------------------|
| Temp (K)                                           | 150                           | 150                                            |
| Crystal system                                     | Triclinic                     | Triclinic                                      |
| Space group                                        | <i>P</i> -1                   | <i>P</i> -1                                    |
| a (Å)                                              | 13.7649(7)                    | 14.930(3)                                      |
| b (Å)                                              | 13.7918(7)                    | 15.514(3)                                      |
| c (Å)                                              | 17.4684(9)                    | 17.571(4)                                      |
| $\alpha$ (deg)                                     | 80.804(2)                     | 98.726(7)                                      |
| $\beta$ (deg)                                      | 87.163(2)                     | 97.283(7)                                      |
| $\gamma$ (deg)                                     | 80.733(2)                     | 107.756(7)                                     |
| <i>V</i> (Å <sup>3</sup> )                         | 3229.9(3)                     | 3766.0(12)                                     |
| <i>Z</i>                                           | 2                             | 2                                              |
| <i>D</i> <sub>calc</sub> (Mg/m <sup>3</sup> )      | 1.457                         | 1.451                                          |
| $\mu$ (Mo K $\alpha$ )(mm <sup>-1</sup> )          | 0.659                         | 0.588                                          |
| <i>F</i> (000)                                     | 1472                          | 1712                                           |
| Reflections collected                              | 50206                         | 52911                                          |
| No. of parameters                                  | 904                           | 915                                            |
| Indep. reflns ( <i>R</i> <sub>int</sub> )          | 13155 (0.0420)                | 13208 (0.0535)                                 |
| <i>R</i> 1[ <i>I</i> > 2 $\sigma$ ( <i>I</i> )]    | 0.0484                        | 0.0379                                         |
| w <i>R</i> 2 [ <i>I</i> > 2 $\sigma$ ( <i>I</i> )] | 0.0979                        | 0.0977                                         |
| Goodness-of-fit on <i>F</i> <sup>2</sup>           | 1.087                         | 1.037                                          |
